# Supplementary material
Source: ML conference proceedings conference paper supplement (https://proceedings.neurips.cc/paper_files/paper/2020/hash/dcd2f3f312b6705fb06f4f9f1b55b55c-Abstract.html)
Supplement: Supplementary file [file dcd2f3f312b6705fb06f4f9f1b55b55c-Supplemental.zip]

# Supplementary Material

## A Detail Derivation of Equation (10) and Equation (12)

The detail derivation of Equation (10) is as follows:

$$\begin{aligned}
& \left\| \frac{\partial \|\hat{\mathbf{w}}_i - \hat{\mathbf{w}}_j\|^{-s}}{\partial \mathbf{w}_i} \right\| \\
&= \left\| \frac{\partial \|\hat{\mathbf{w}}_i - \hat{\mathbf{w}}_j\|^{-s}}{\partial \|\hat{\mathbf{w}}_i - \hat{\mathbf{w}}_j\|} \frac{\partial \|\hat{\mathbf{w}}_i - \hat{\mathbf{w}}_j\|}{\partial (\hat{\mathbf{w}}_i - \hat{\mathbf{w}}_j)} \frac{\partial (\hat{\mathbf{w}}_i - \hat{\mathbf{w}}_j)}{\partial \hat{\mathbf{w}}_i} \frac{\partial \|\hat{\mathbf{w}}_i\|}{\partial \mathbf{w}_i} \right\| \\
&= \left\| \frac{s}{\|\hat{\mathbf{w}}_i - \hat{\mathbf{w}}_j\|^{s+1}} \frac{(\hat{\mathbf{w}}_i - \hat{\mathbf{w}}_j)^T}{\|\hat{\mathbf{w}}_i - \hat{\mathbf{w}}_j\|} I \frac{(I - M_{\mathbf{w}_i})}{\|\mathbf{w}_i\|} \right\| \\
&= \frac{\|s(I - M_{\mathbf{w}_i})\hat{\mathbf{w}}_j\|}{\|\mathbf{w}_i\| \|\hat{\mathbf{w}}_i - \hat{\mathbf{w}}_j\|^{s+2}} \\
&= \frac{s}{\|\mathbf{w}_i\|} \frac{\sin \theta_{ij}}{(2 \sin \frac{\theta_{ij}}{2})^{s+2}} \\
&= \frac{s}{\|\mathbf{w}_i\|} \frac{\cos \frac{\theta_{ij}}{2}}{(2 \sin \frac{\theta_{ij}}{2})^{s+1}}, \quad \text{with } M_{\mathbf{w}_i} = \frac{\mathbf{w}_i \mathbf{w}_i^T}{\|\mathbf{w}_i\|^2}
\end{aligned}$$

The detail derivation of Equation (12) is as follows:

$$\begin{aligned}
& \left\| \frac{\partial \log \|\hat{\mathbf{w}}_i - \hat{\mathbf{w}}_j\|}{\partial \mathbf{w}_i} \right\| \\
&= \frac{1}{\|\hat{\mathbf{w}}_i - \hat{\mathbf{w}}_j\|} \left\| \frac{\partial \|\hat{\mathbf{w}}_i - \hat{\mathbf{w}}_j\|^{-(-1)}}{\partial \mathbf{w}_i} \right\| \\
&= \frac{1}{\|\hat{\mathbf{w}}_i - \hat{\mathbf{w}}_j\|} \frac{|-1|}{\|\mathbf{w}_i\|} \frac{\cos \frac{\theta_{ij}}{2}}{(2 \sin \frac{\theta_{ij}}{2})^{-1+1}} \\
&= \frac{1}{\|\mathbf{w}_i\|} \frac{\cos \frac{\theta_{ij}}{2}}{(2 \sin \frac{\theta_{ij}}{2})}
\end{aligned}$$

## B Dataset Description of Section 5

We conduct our image classification experiments on CIFAR100 [4] and TinyImageNet [5]. The CIFAR100 consists of 50k and 10k images of  $32 \times 32$  pixels for the training and test sets respectively. We present experiments trained on the training set and evaluated on the test set. The TinyImageNet dataset is a subset of the ILSVRC2012 classification dataset [8]. It consists of 200 object classes, and each class has 500 training images, 50 validation images, and 50 test images. All images have been downsampled to  $64 \times 64$  pixels. As the labels for test set are not released, we present experiments trained on the training set and evaluated on the validation set. For both datasets, we follow the simple data augmentation in [6]. For training, 4 pixels are padded on each side and a  $32 \times 32$  crop for CIFAR100 or a  $64 \times 64$  crop for TinyImageNet is randomly sampled from the padded image or its horizontal flip. For testing, we only evaluate the single view of the original  $32 \times 32$  image for CIFAR100 or  $64 \times 64$  image for TinyImageNet. Note that our focus is on the effectiveness of our proposed MMA regularization, not on pushing the state-of-the-art results, so we do not use any more data augmentation and training tricks to improve accuracy.

## C Implementation Settings of Section 6

We employ CASIA [10] as training dataset and LFW [3], CFP-FP [9], and AgeDB-30 [7] as face verification datasets. For the embedding network, we employ ResNet50 [2]. The angular margin  $m$  is set to 0.5 according to the ArcFace paper [1]. The regularization coefficient  $\lambda$  is set to 0.03. Other hyperparameters and settings exactly follow the ArcFace paper [1], except for the batchsize and learning schedule. Due to the limit of hardware, we set the batch size to 440 (the ArcFace paper sets to 512). Accordingly, we finish the training process at 38K iterations and decay the learning rate by a factor of 10 at 23750 and 33250 iterations to ensure the same training samples.

## D Supplement to Section 5.2: Comparison of the Minimal Pairwise Angle

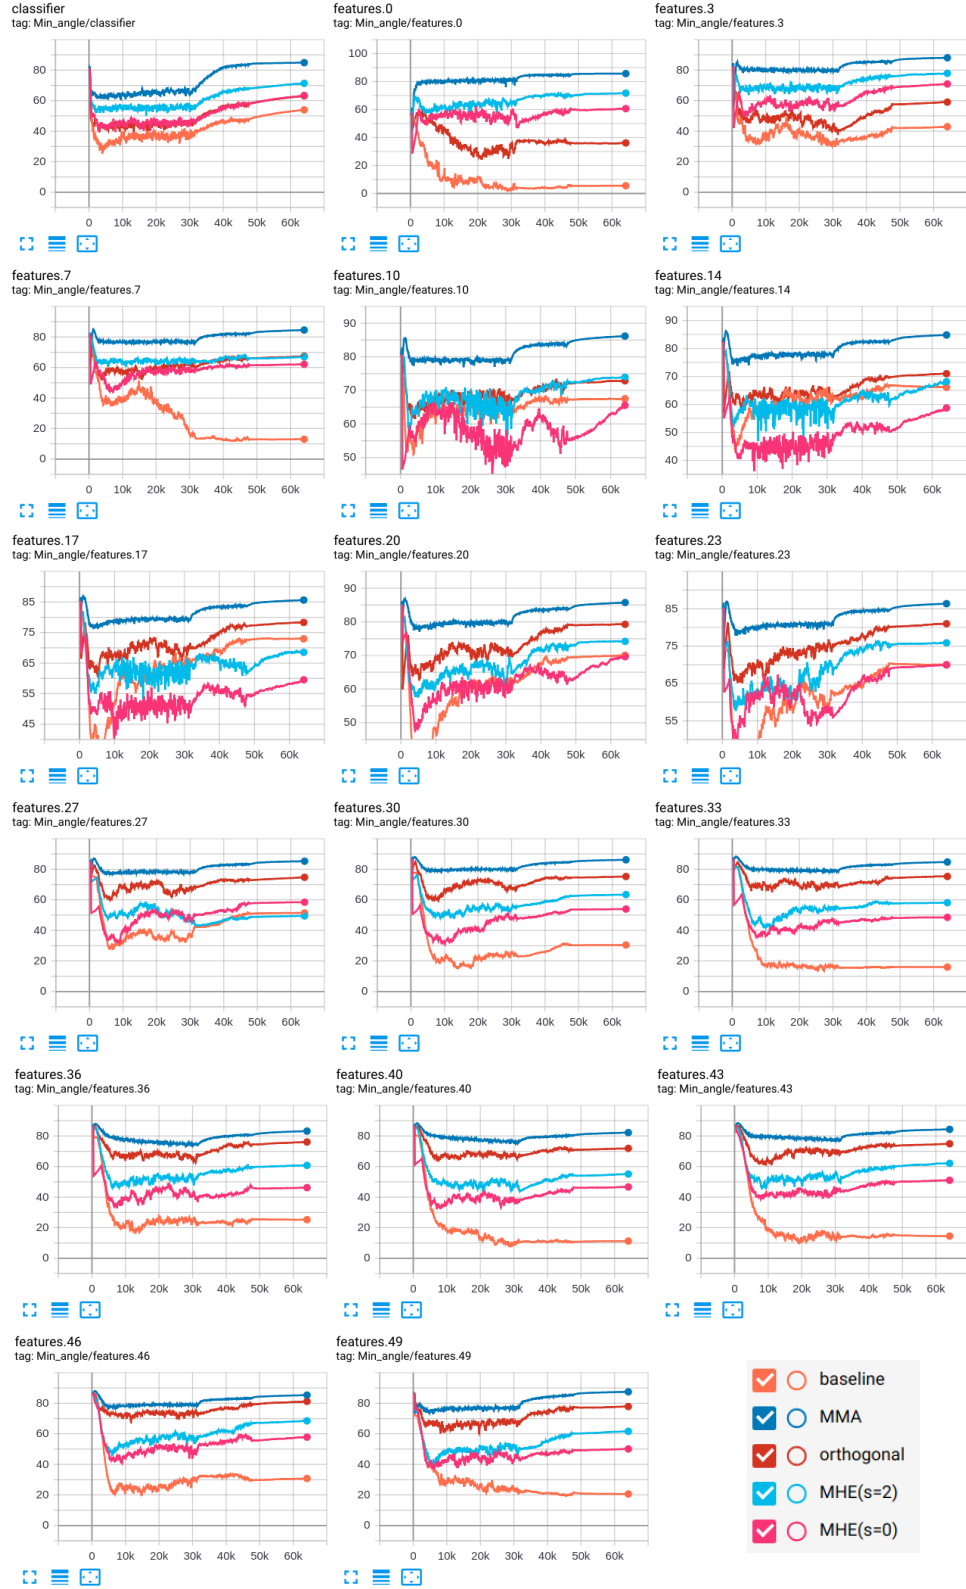

Figure 1: Comparison of the minimal pairwise angle from all layers of VGG19-BN trained on CIFAR100 with several different diversity regularization. The MMA regularization gets the largest minimal pairwise angle consistently across all layers, and therefore the most diverse weight vectors.

## References

- [1] Jiankang Deng, Jia Guo, Niannan Xue, and Stefanos Zafeiriou. Arcface: Additive angular margin loss for deep face recognition. In *Proceedings of the IEEE Conference on Computer Vision and Pattern Recognition*, pages 4690–4699, 2019.
- [2] Kaiming He, Xiangyu Zhang, Shaoqing Ren, and Jian Sun. Deep residual learning for image recognition. In *Proceedings of the IEEE conference on computer vision and pattern recognition*, pages 770–778, 2016.
- [3] Gary B Huang, Marwan Mattar, Tamara Berg, and Eric Learned-Miller. Labeled faces in the wild: A database for studying face recognition in unconstrained environments. 2008.
- [4] Alex Krizhevsky and Geoffrey Hinton. Learning multiple layers of features from tiny images. Technical report, Citeseer, 2009.
- [5] Ya Le and Xuan Yang. Tiny imagenet visual recognition challenge. *CS 231N*, 2015.
- [6] Chen-Yu Lee, Saining Xie, Patrick Gallagher, Zhengyou Zhang, and Zhuowen Tu. Deeply-supervised nets. In *Artificial Intelligence and Statistics*, pages 562–570, 2015.
- [7] Stylianos Moschoglou, Athanasios Papaioannou, Christos Sagonas, Jiankang Deng, Irene Kotsia, and Stefanos Zafeiriou. Agedb: the first manually collected, in-the-wild age database. In *Proceedings of the IEEE Conference on Computer Vision and Pattern Recognition Workshops*, pages 51–59, 2017.
- [8] Olga Russakovsky, Jia Deng, Hao Su, Jonathan Krause, Sanjeev Satheesh, Sean Ma, Zhiheng Huang, Andrej Karpathy, Aditya Khosla, Michael Bernstein, et al. Imagenet large scale visual recognition challenge. *International journal of computer vision*, 115(3):211–252, 2015.
- [9] Soumyadip Sengupta, Jun-Cheng Chen, Carlos Castillo, Vishal M Patel, Rama Chellappa, and David W Jacobs. Frontal to profile face verification in the wild. In *2016 IEEE Winter Conference on Applications of Computer Vision (WACV)*, pages 1–9. IEEE, 2016.
- [10] Dong Yi, Zhen Lei, Shengcai Liao, and Stan Z Li. Learning face representation from scratch. *arXiv preprint arXiv:1411.7923*, 2014.
